# Supplementary material for: The Tower Building Task: A Behavioral Tool to Evaluate Recreational Risk-Taking
Source: MDPI journal article supplement (doi:10.3390/bs12090325), 2022-09-08

## **Supplementary Material**

|                                                                                                                              |      |
|------------------------------------------------------------------------------------------------------------------------------|------|
| S1. Instructions for each TBT condition.....                                                                                 | 2-3  |
| S2. Criteria for considering the involuntary loss of height as a collapse.....                                               | 3    |
| S3. How the record was determined? .....                                                                                     | 3    |
| S4. Translation in Spanish of the Sensation Seeking Scale.....                                                               | 4-6  |
| S5. Additional descriptors of behavior in the TBT.....                                                                       | 7    |
| S6. Scatter plots of the non-significant associations between fixed height gain and the two other risk-related measures..... | 8-10 |

## **S1. Instructions in Spanish of the Tower Building Task in each of the four conditions**

### **I) Baseline**

- (i) El objetivo es construir la torre más alta que puedas en un periodo de 10 minutos.*
- (ii) Utiliza los bloques (se hace referencia a la pila de bloques señalándola con el dedo) para construir una torre sobre el tablero de melamina. Aunque los bloques son del juego Jenga, la prueba no se trata de jugar Jenga.*
- (iii) Puedes poner los bloques en esta posición (mostrar horizontal A<sup>1</sup>); en esta (mostrar horizontal B<sup>2</sup>); o en esta (mostrar vertical). También está permitido quitar los bloques y volverlos a poner en las combinaciones que quieras.*
- (iv) Si la torre colapsa, puedes reintentarlo cuantas veces quieras, siempre y cuando no haya terminado el tiempo.*
- (v) Si estás conforme con la altura de tu torre puedes acabar antes del tiempo estipulado. No es obligatorio usar todos los bloques.*

### **II) Single Collapse**

- (i) El objetivo es construir la torre más alta que puedas en un periodo de 10 minutos.*
- (ii) Utiliza los bloques (se hace referencia a la pila de bloques señalándola con el dedo) para construir una torre sobre el tablero de melamina. Aunque los bloques son del juego Jenga, la prueba no se trata de jugar Jenga.*
- (iii) Puedes poner los bloques en esta posición (mostrar horizontal A); en esta (mostrar horizontal B); o en esta (mostrar vertical). También está permitido quitar los bloques y volverlos a poner en las combinaciones que quieras.*
- (iv) Si la torre colapsa, la prueba termina sin importar el tiempo residual.*
- (v) Si estás conforme con la altura de tu torre puedes acabar antes del tiempo estipulado. No es obligatorio usar todos los bloques.*

### **III) Record**

- (i) El objetivo es construir la torre más alta que puedas en un periodo de 10 minutos.*
- (ii) La marca roja que ves aquí (señalar con el dedo la marca de referencia en el poste de madera) indica el récord de la torre más alta construida hasta ahora por otros estudiantes que han participado en la prueba.*
- (iii) Utiliza los bloques (se hace referencia a la pila de bloques señalándola con el dedo) para construir una torre sobre el tablero de melamina. Aunque los bloques son del juego Jenga, la prueba no se trata de jugar Jenga.*
- (iv) Puedes poner los bloques en esta posición (mostrar horizontal A); en esta (mostrar horizontal B); o en esta (mostrar vertical). También está permitido quitar los bloques y volverlos a poner en las combinaciones que quieras.*
- (v) Si la torre colapsa, puedes reintentarlo cuantas veces quieras, siempre y cuando no haya terminado el tiempo.*
- (vi) Si estás conforme con la altura de tu torre puedes acabar antes del tiempo estipulado. No es obligatorio usar todos los bloques.*

### **IV) Combined condition: Record-Single Collapse**

- (i) El objetivo es construir la torre más alta que puedas en un periodo de 10 minutos.*
- (ii) La marca roja que ves aquí (señalar con el dedo la marca de referencia en el poste de madera) indica el récord de la torre más alta construida hasta ahora por otros estudiantes que han participado en la prueba.*
- (iii) Utiliza los bloques (se hace referencia a la pila de bloques señalándola con el dedo) para construir una torre sobre el tablero de melamina. Aunque los bloques son del juego Jenga, la prueba no se trata de jugar Jenga.*
- (iv) Puedes poner los bloques en esta posición (mostrar horizontal A); en esta (mostrar horizontal B); o en esta (mostrar vertical). También está permitido quitar los bloques y volverlos a poner en las combinaciones que quieras.*
- (v) Si la torre colapsa, la prueba termina sin importar el tiempo residual.*
- (vi) Si estás conforme con la altura de tu torre puedes acabar antes del tiempo estipulado. No es obligatorio usar todos los bloques.*

---

<sup>1</sup> Horizontal A: mayor área de contacto, menor altura.

<sup>2</sup> Horizontal B: menor área de contacto, mayor altura.

Instructions are written in the order in which they were stated prior to the beginning of the task. All participants were told after instructions were given, that if any questions arose, they were allowed to ask and clarify doubts throughout the building procedure.

## **S2. Collapse criteria**

To consider the undesired loss of height as a collapse three criteria had to be met: i) the loss had to be of at least a quarter of the height constructed, and ii) had to involve a quarter of the pieces that made up the tower, iii) which had to be built with at least 10 blocks.

## **S3. How the record was determined**

Participants from the R and RSC condition were informed that the red mark on a wooden post beside the building board indicated the tower height achieved by a previous participant as the tallest across all previous trials; such information was spurious. The height of the red mark was determined based on a pilot study ( $n = 12$ ) in which participants were presented with one of three “record” references: 90 cm, 120 cm, and 150 cm. Participants presented with the 90 cm record ( $n = 4$ ) reported it was easy to reach, while those presented with a 150 cm record ( $n = 4$ ) reported that they perceived it as unfeasible and preferred to ignore it. Thus, we chose a middle point (120 cm) to provide a record that was not too easy nor too difficult to achieve.

#### S4. Translation in Spanish of the Sensation Seeking Scale: Escala de Búsqueda de Sensaciones

Instrucciones: cada uno de los elementos que vienen abajo tiene dos opciones, A y B. Por favor indica (encierra en un círculo) la respuesta que mejor describe tus preferencias o sentimientos.

En algunos casos, puede ser que ambos elementos te parezcan apropiados. Elige por favor el que mejor lo haga. En otros casos, puede ser que no te guste ninguna de las opciones, si es así, marca el elemento que te disguste menos. Intenta responder todos y cada uno de los elementos.

Es importante responder a todos los elementos con solo una elección, ya sea A o B. Estamos interesados en tus preferencias o inclinaciones, no en tu opinión sobre estas cuestiones ni en la opinión que se supone debes de tener. No existen respuestas correctas o incorrectas. Se franco y danos un juicio honesto sobre ti.

|     | A                                                                                                                         | B                                                                                                   |
|-----|---------------------------------------------------------------------------------------------------------------------------|-----------------------------------------------------------------------------------------------------|
| 1.  | Me gustan las fiestas “alocadas” y desinhibidas                                                                           | Prefiero las fiestas tranquilas con buena conversación                                              |
| 2.  | Hay películas que disfruto ver por segunda o tercera vez                                                                  | No tolero ver películas que ya he visto antes                                                       |
| 3.  | Frecuentemente sueño con ser un montañista                                                                                | No entiendo a la gente que arriesga la vida escalando montañas                                      |
| 4.  | Me disgustan los olores corporales                                                                                        | Me gustan algunos olores corporales que son como de tierra                                          |
| 5.  | Me aburre frecuentar a las mismas personas                                                                                | Me gusta la sensación de comodidad de los buenos amigos                                             |
| 6.  | Me gusta explorar una ciudad desconocida o una parte nueva de la ciudad por mi cuenta, incluso si esto significa perderme | Prefiero tener un guía en un lugar que no conozco                                                   |
| 7.  | Me disgusta la gente que hace o dice cosas sólo para escandalizar o molestar a otros                                      | Cuando puedes predecir todo lo que una persona dice o hace, ésta se vuelve aburrida                 |
| 8.  | Usualmente no disfruto una película u obra si puedo predecir lo que pasará                                                | No me molesta ver una película u obra donde puedo predecir lo que va a pasar                        |
| 9.  | He probado la marihuana o me gustaría probarla                                                                            | Nunca fumaría marihuana                                                                             |
| 10. | No me gustaría probar una droga que me cause efectos extraños o peligrosos                                                | Me gustaría probar alguna de las nuevas drogas que te hacen alucinar                                |
| 11. | Una persona sensata evita actividades que son peligrosas                                                                  | A veces hago cosas que me dan un poco de miedo                                                      |
| 12. | No me gustan los “swingers” (gente desinhibida que acostumbra intercambiar parejas sexuales)                              | Disfruto la compañía de “swingers” (gente desinhibida que acostumbra intercambiar parejas sexuales) |
| 13. | Los estimulantes me ponen incómodo                                                                                        | Con frecuencia me gusta sentir el efecto de algunas drogas (alcohol o marihuana)                    |

|                                                                                           |                                                                                                                                   |
|-------------------------------------------------------------------------------------------|-----------------------------------------------------------------------------------------------------------------------------------|
| 14. Me gusta probar comidas nuevas que no había probado antes                             | Me gusta mantener la cocina ordenada y así evitar desilusiones y molestias                                                        |
| 15. Disfruto ver películas caseras o que otros me cuenten de sus viajes                   | Ver películas caseras u oír de algún viaje de otra persona me aburre enormemente                                                  |
| 16. Me gustaría practicar el deporte de esquí acuático                                    | No me gustaría aprender esquí acuático                                                                                            |
| 17. Me gustaría intentar surfear                                                          | No me gustaría intentar surfear                                                                                                   |
| 18. Me gustaría salir de viaje sin planes, rutas definitivas o un programa de actividades | Cuando salgo de viaje planeo mi ruta e itinerario con bastante cuidado                                                            |
| 19. Prefiero hacerme amigo de gente “centrada”                                            | Me gustaría tener amigos en grupos más marginales como artistas o “punks”                                                         |
| 20. No me gustaría aprender a pilotear un avión                                           | Me gustaría aprender a pilotear un avión                                                                                          |
| 21. Prefiero la superficie del agua que las profundidades                                 | Me gustaría practicar buceo                                                                                                       |
| 22. Me gustaría conocer personas homosexuales                                             | Prefiero evitar la compañía de alguien que sospecho es homosexual                                                                 |
| 23. Me gustaría intentar saltar en paracaídas                                             | Nunca intentaría saltar de un avión, con o sin paracaídas                                                                         |
| 24. Prefiero amigos que son emocionantemente impredecibles                                | Me gustan los amigos que son predecibles y de fiar                                                                                |
| 25. No me interesa una experiencia sólo por el simple hecho de tenerla                    | Me gusta tener experiencias y sensaciones nuevas y emocionantes, incluso si dan un poco miedo, son poco convencionales o ilegales |
| 26. La esencia del buen arte está en su claridad, simetría de formas y armonía de colores | Con frecuencia encuentro belleza en los colores “chocantes” y las formas irregulares de las pinturas modernas                     |
| 27. Disfruto pasar el tiempo en el entorno familiar de casa                               | Me pongo inquieto si debo quedarme en casa por algún periodo de tiempo                                                            |
| 28. Me gusta echarme clavados desde el trampolín más alto                                 | No me gusta lo que siento al pararme en el trampolín más alto (o ni me acerco)                                                    |
| 29. Me gusta salir con miembros del sexo opuesto que son físicamente atractivos           | Me gusta salir con miembros del sexo opuesto que comparten mis valores                                                            |
| 30. Un exceso de alcohol arruina una fiesta porque la gente se pone ruidosa y bulliciosa  | La abundancia de alcohol es la clave para una buena fiesta                                                                        |
| 31. El pecado social más grave es ser descortés                                           | El pecado social mas grave es ser aburrido                                                                                        |
| 32. Una persona debería de tener bastante experiencia sexual antes del matrimonio         | Es mejor si un matrimonio comienza su experiencia sexual al casarse                                                               |

- |                                                                                             |                                                                                             |
|---------------------------------------------------------------------------------------------|---------------------------------------------------------------------------------------------|
| 33. Aun si tuviera dinero, no me gustaría relacionarme con gente rica que presume su dinero | Podría imaginarme buscando placeres en el mundo junto con gente rica que presume su dinero  |
| 34. Me gustan las personas astutas y ocurrentes aun cuando a veces insulten a otros         | No me gusta la gente que se divierte a costa de los sentimientos de otros                   |
| 35. Hay demasiadas escenas de sexo en las películas                                         | Disfruto las escenas de sexo en las películas                                               |
| 36. Me siento mejor después de tomar un par de tragos                                       | Algo está mal en la gente que necesita del alcohol para sentirse bien                       |
| 37. La gente se debe de vestir según algún estándar de buen gusto, pulcritud y estilo       | La gente debería de vestir a su manera aun cuando la combinación de prendas resulte extraña |
| 38. Navegar largas distancias en un bote pequeño es temerario                               | Me gustaría navegar largas distancias en un barco pequeño pero resistente                   |
| 39. No tengo paciencia con las personas sosas y aburridas                                   | Encuentro algo interesante en prácticamente cada persona con la que hablo                   |
| 40. Bajar una pendiente montañosa en esquíes es una buena forma de acabar en muletas        | Pienso que disfrutaría la sensación de bajar una montaña esquiando rápidamente              |

#### S5. Table of additional descriptors of behavior in the TBT

Mean  $\pm$  standard deviation or frequency (% percentage) of the descriptors of behavior for each of the TBT conditions.

| <b>Descriptor of behavior</b>            | <b>Baseline<br/>(n = 29)</b> | <b>Single Collapse<br/>(n = 30)</b> | <b>Record<br/>(n = 28)</b> | <b>Record-Single<br/>Collapse (n = 30)</b> |
|------------------------------------------|------------------------------|-------------------------------------|----------------------------|--------------------------------------------|
| <i>Maximum height (cm)</i>               | 85.43 $\pm$ 28.24            | 81.2 $\pm$ 37.71                    | 89.66 $\pm$ 25.61          | 85.82 $\pm$ 27.13                          |
| <i>Addition rate (s per block added)</i> | 5.08 $\pm$ 2.6               | 4.76 $\pm$ 1.81                     | 4.54 $\pm$ 1.23            | 5.1 $\pm$ 1.63                             |
| <i>Duration of the trial (s)</i>         | 522.73 $\pm$ 123.47          | 414.78 $\pm$ 144.62                 | 569.47 $\pm$ 73.71         | 394.15 $\pm$ 144.27                        |
| <i>Proportion of vertical pieces</i>     | 0.16 $\pm$ 0.26              | 0.18 $\pm$ 0.26                     | 0.23 $\pm$ 0.24            | 0.24 $\pm$ 0.28                            |
| <i>Number of collapses</i>               | 0.9 $\pm$ 1.08               | 0.3 $\pm$ 0.47                      | 1.54 $\pm$ 1.37            | 0.53 $\pm$ 0.51                            |
| <i>Early conclusion</i>                  | 13 (44.83%)                  | 16 (53.33%)                         | 8 (28.57%)                 | 10 (33.33%)                                |
| <i>Collapse</i>                          | 13 (44.83%)                  | 9 (30.00%)                          | 20 (71.43%)                | 16 (53.33%)                                |

*Note.* Maximum Height = tallest tower achieved throughout the trial; Duration of the trial = amount of time spent on the task; Early conclusion = number of participants who chose to finish the trial before the established 10 minutes; Collapse = number of participants who had at least one collapse.

## S6. Non-significant associations between fixed height gain and the two other risk-related measures

Scatter plots for the i) Baseline, ii) Record, and iii) Record-Single Collapse conditions of the TBT in relation to the BART and the SSS measures. Filled circles show participants' fixed height gain on the x-axis and the adjusted average number of pumps or the sensation seeking score on the y-axis. Blue lines show the linear association between the two variables of each plot and the gray area surrounding such lines indicates the confidence intervals. The fixed height gain is an index that equates to the height gained per block added adjusted for the duration of the trial.

### i) Baseline condition

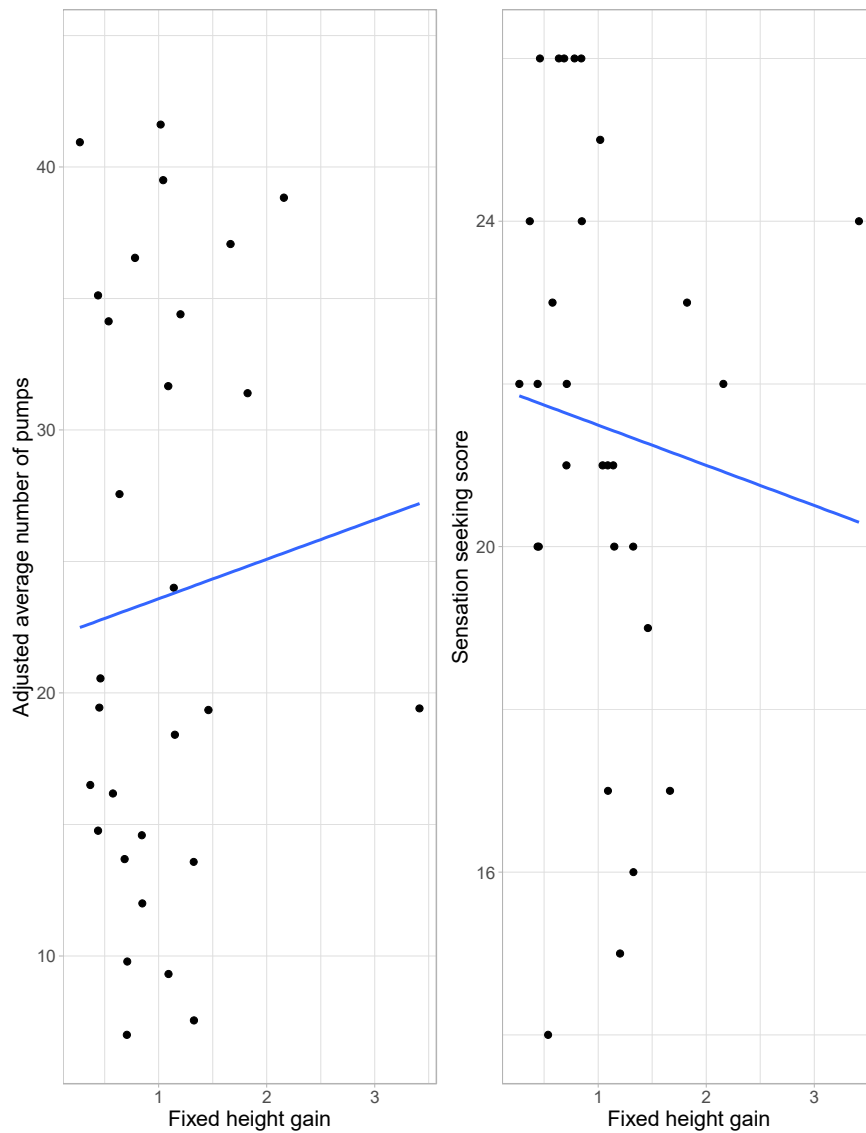



ii) Record condition

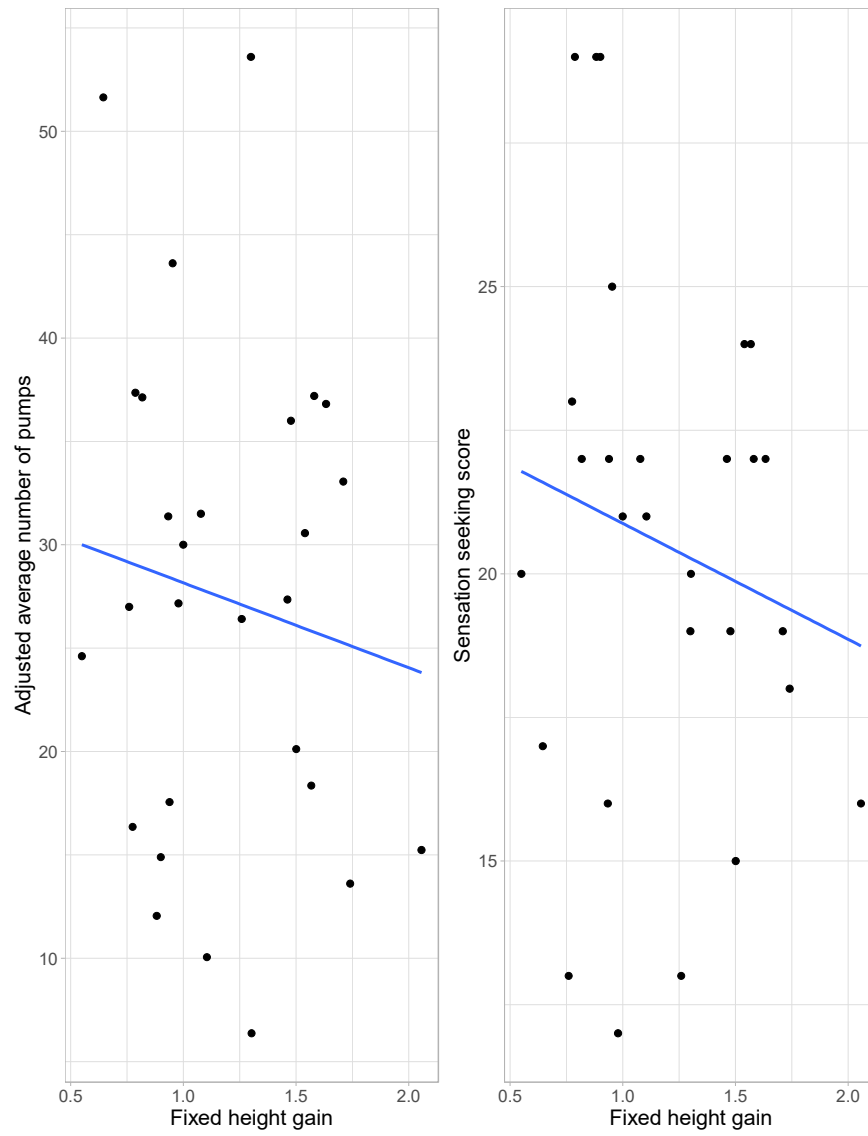

iii) Record-Single Collapse condition

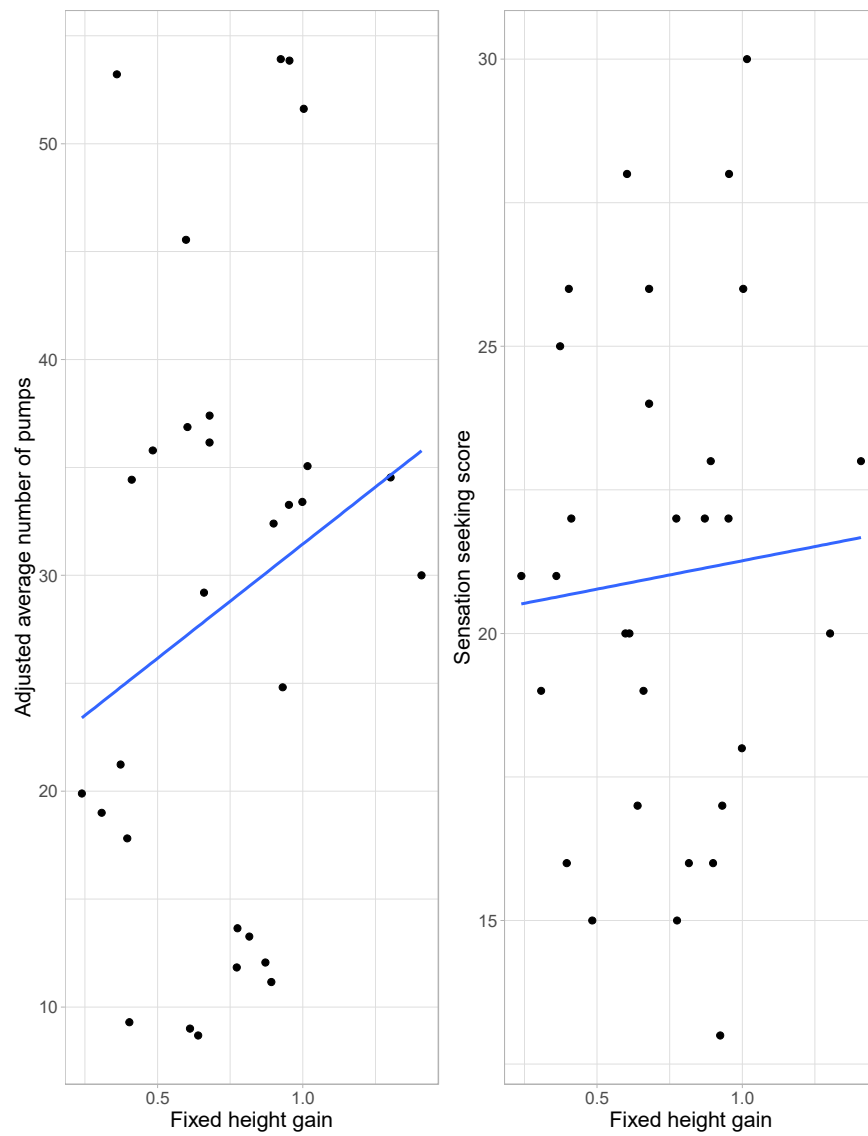

Supplement: s1 [file s1]
